# Supplementary material for: Sustainable recovery of high-purity nickel from real electroplating sludge via optimized leaching–precipitation process
Source: Royal Society of Chemistry journal article supplement (doi:10.1039/d5ra08573j), 2025-01-01
Supplement: d5ra08573j1.pdf [file d5ra08573j1.pdf]

## Supporting Information

**Table S1.** Composition of Ni plating sludge sample

| Element | Units | Content       |
|---------|-------|---------------|
| Al      | mg/kg | 7350 ± 113    |
| Cr      | mg/kg | 6845 ± 254    |
| Fe      | mg/kg | 35112 ± 2131  |
| Ni      | mg/kg | 132071 ± 5343 |
| Na      | mg/kg | 26114 ± 1424  |
| Ca      | mg/kg | 10065 ± 954   |

**Table S2.** Summary of production cost of 1 kg Ni(OH)<sub>2</sub>/NiOOH

| Price Component                                           | Consumption  | Unit Price        | Cost (USD/kg product) |
|-----------------------------------------------------------|--------------|-------------------|-----------------------|
| H <sub>2</sub> SO <sub>4</sub> solution (5%) for leaching | 22–26 L      | 0.15–0.25 USD/L   | 3.3 – 6.5             |
| NaOH for pH adjustment and precipitation                  | 2.0–2.3 kg   | 1.0–1.5 USD/kg    | 2.0 – 3.5             |
| Electricity (stirring, separation, drying) <sup>1</sup>   | 30–45 kWh    | 0.12–0.15 USD/kWh | 3.6 – 6.8             |
| Hazardous sludge disposal (Fe–Al–Cr residue)              | 0.05–0.12 kg | —                 | 0.8 – 2.4             |
| Equipment depreciation, maintenance & labor               | —            | —                 | 1.0 – 1.5             |
| <b>Total production cost</b>                              | —            | —                 | <b>10.7 – 20.7</b>    |
| Market price: Ni(OH) <sub>2</sub> <sup>2</sup>            | —            | —                 | 28 – 40               |
| Market price: NiOOH <sup>3</sup>                          | —            | —                 | 30 – 45               |
| <b>Potential profits</b>                                  | —            | —                 | <b>15 – 25</b>        |

**Note:** The calculations were mostly based on the lab-scale process. Costs of labor, equipment and facility were not included.

Prices of chemicals were derived from commercial webpages.

<sup>1</sup>Vietnam's electricity cost was taken from Vietnam Power Company (<https://en.evn.com.vn/>).

$^{2,3}\text{Ni}(\text{OH})_2/\text{NiOOH}$  powder price is taken from Alibaba website or supplier quote (<https://www.alibaba.com/>).

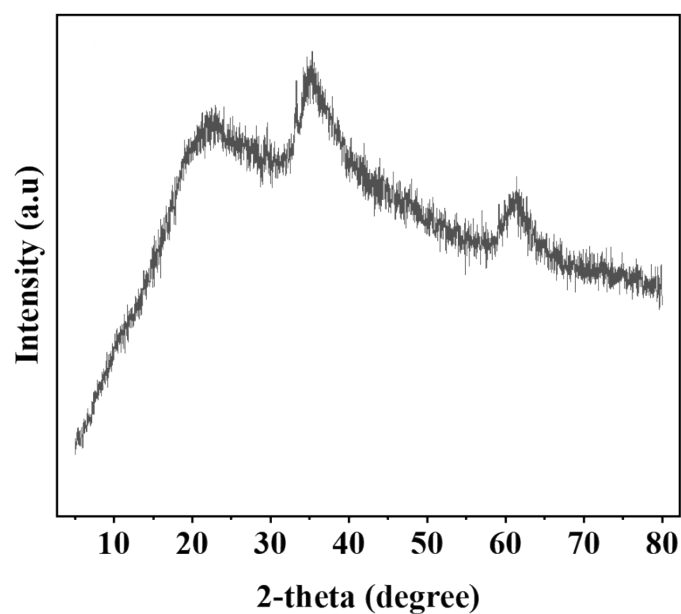

**Figure S1.** XRD pattern of initial Ni sludge sample

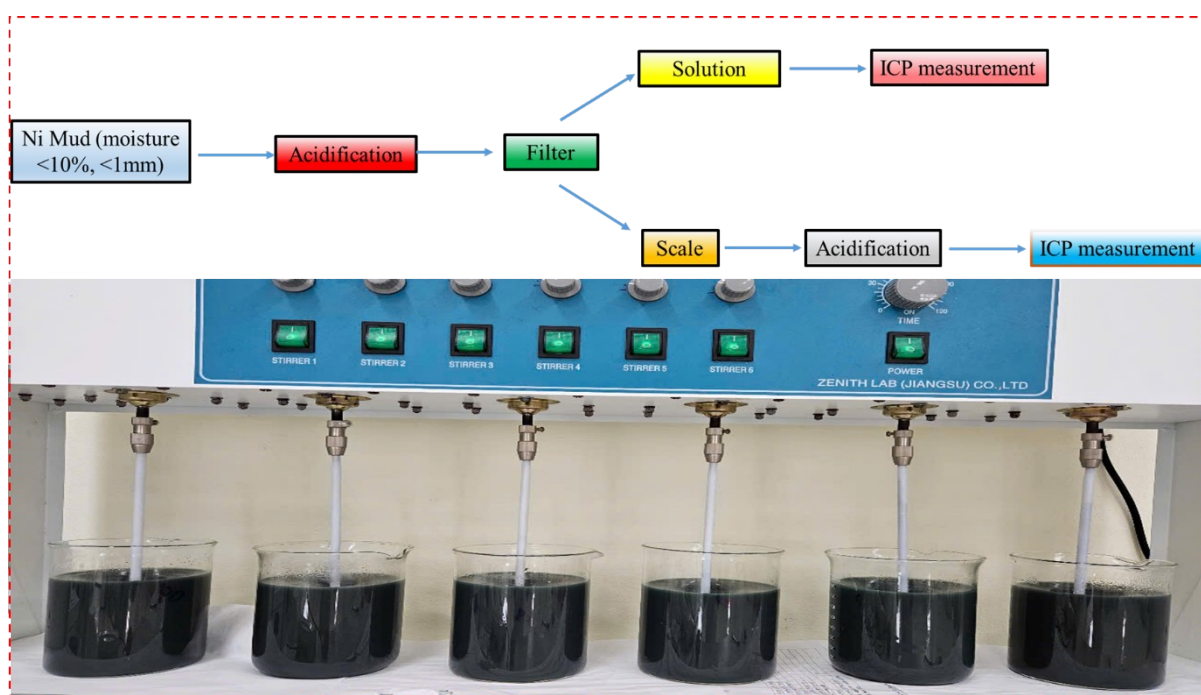

**Figure S2.** Ni sludge treatment process: acidification, leaching of solution and solid residue, and metal analysis by ICP.

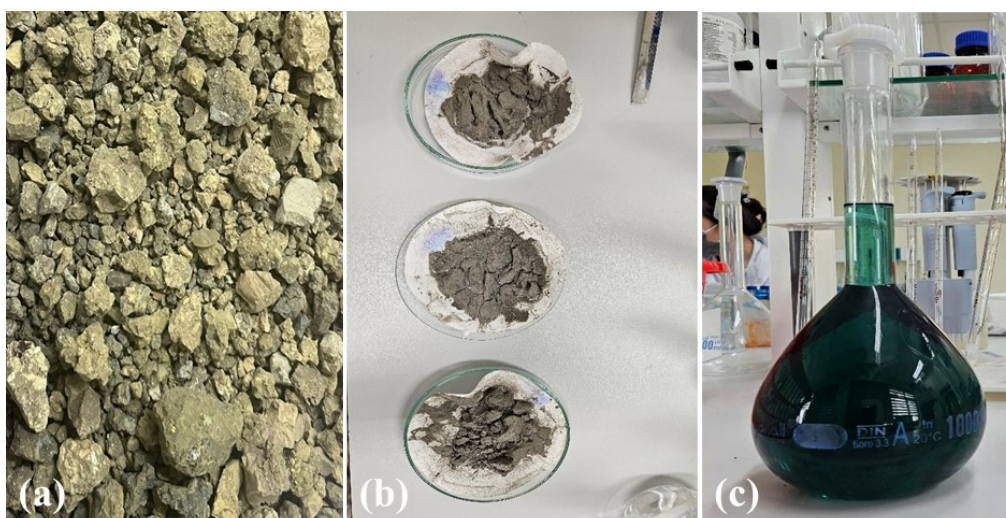

**Figure S3.** (a) Sludge before and (b) after digestion, and (c) solution after digestion

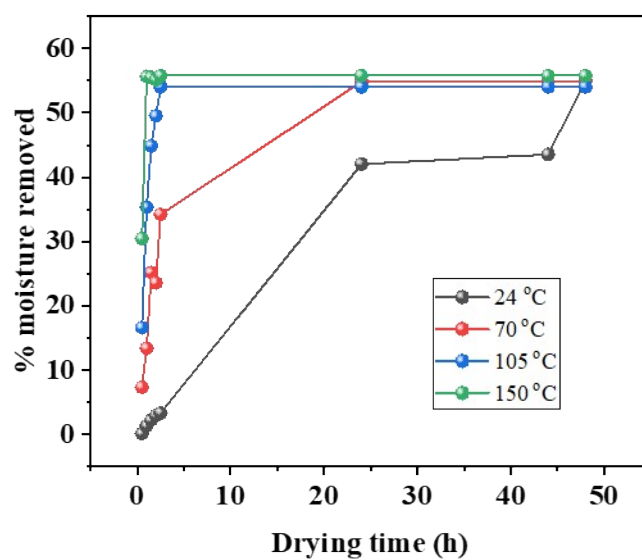

**Figure S4.** Effect of drying time to % moisture removed

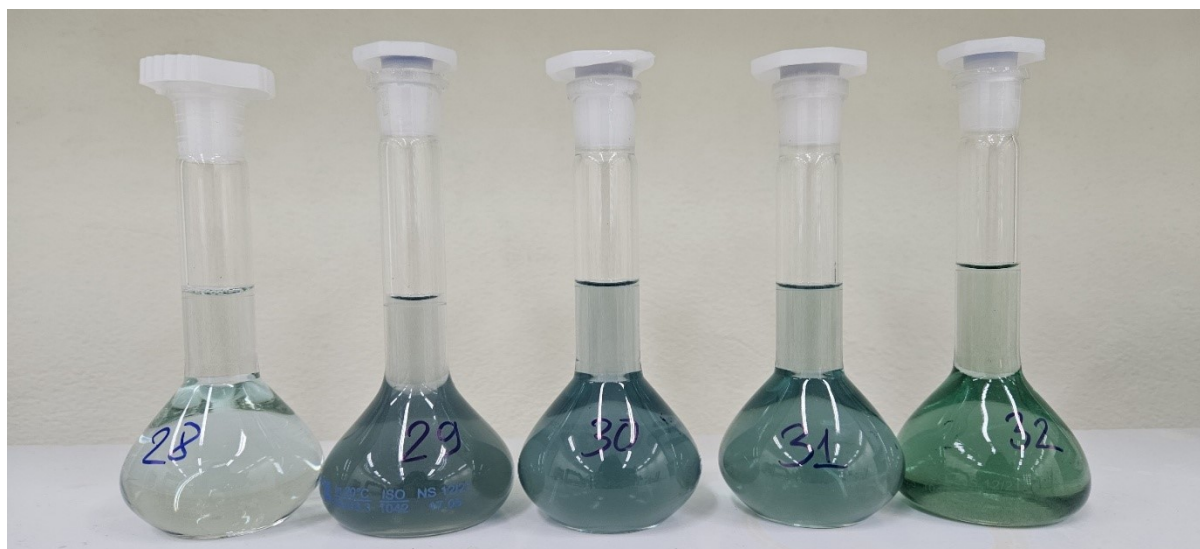

**Figure S5.** Solution (diluted 100 times) after leaching with  $\text{H}_2\text{SO}_4$  at concentrations of 2 – 5 – 10 – 15 – 20%

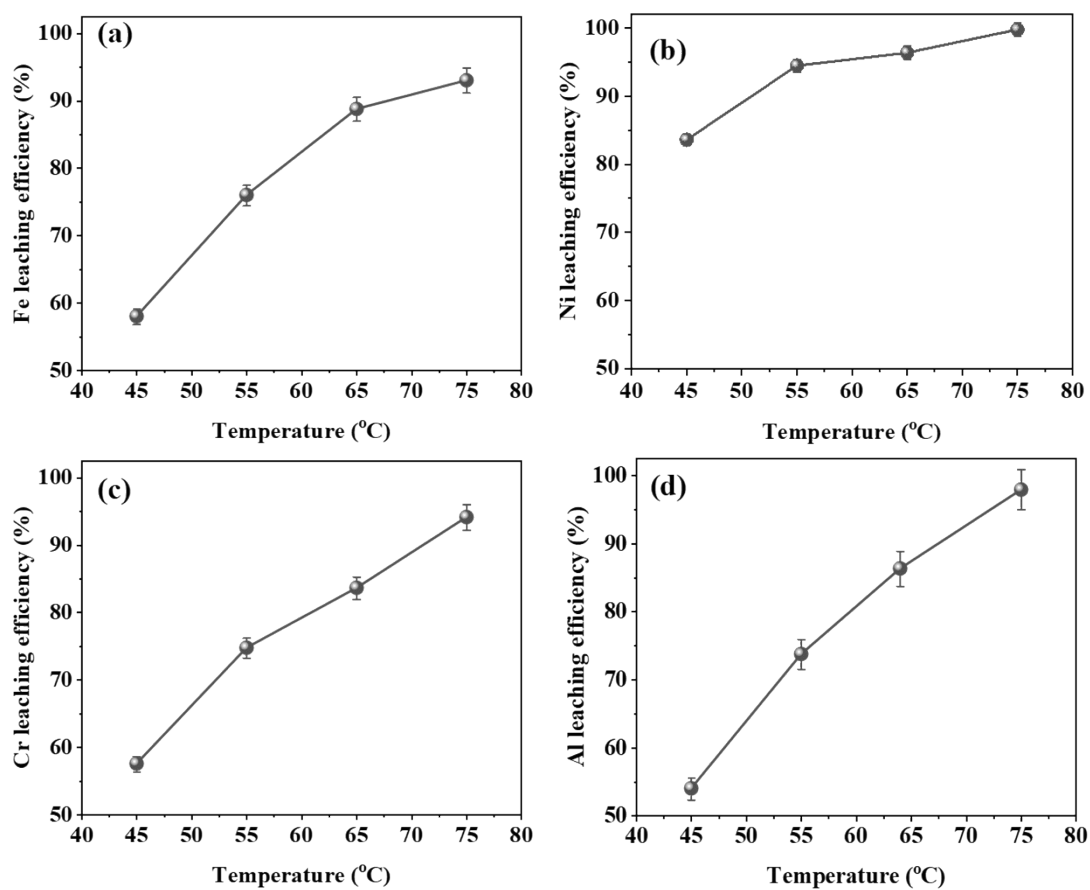

**Figure S6.** Correlation between temperature and leaching efficiency at 15 min for Fe, Ni, Cr, and Al. Error bars indicate the standard deviation calculated from three replicates.

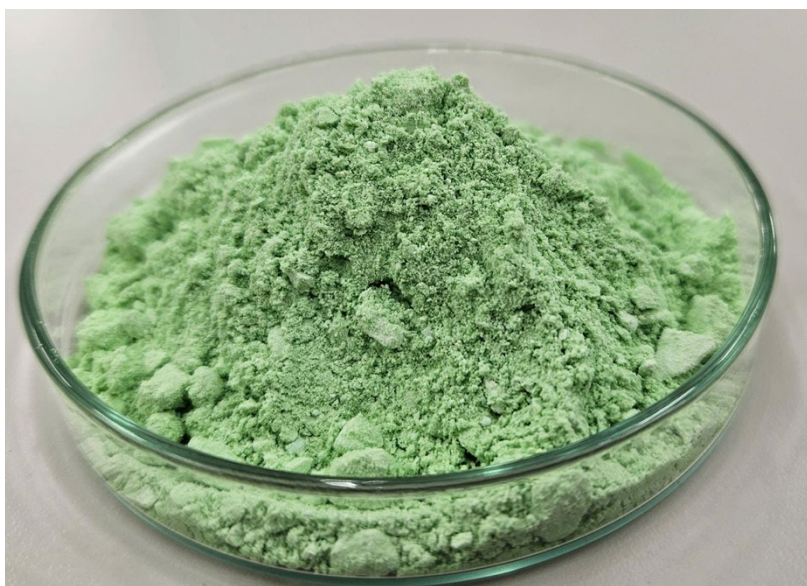

**Figure S7.** Photograph of the green nickel precipitate obtained under optimal precipitation conditions. The distinctive green color confirms the formation of  $\text{NiOOH}$  and  $\text{Ni}(\text{OH})_2$  as the dominant solid phase.
